# Supplementary material for: Cloning, purification, and characterization of GH3 β-glucosidase, MtBgl85, from Microbulbifer thermotolerans DAU221
Source: PeerJ. 2019 Jul 22;7:e7106. doi: 10.7717/peerj.7106 (PMC6657685; doi:10.7717/peerj.7106)
Supplement: Data S1 — Fig. 4: raw data of the optimal temperature and pH and temperature and pH stability for MtBgl85 of M. thermotolerans DAU221. Fig. 5: raw data of the NaCl effect on MtBgl85 of M. thermotolerans DAU221. Fig. 6: raw data of the glucose effect on MtBgl85 of M. thermotolerans DAU221. [file peerj-07-7106-s001.xlsx]

## Sheet: Fig.4
Temp.	Otimal	Stability
10	0	100
20	0.44	96.56
30	17.92	79.16
40	55.65	39.17
50	100	38.32
60	11.73	0
70	0	0
80	0	0
pH	Opt.	Stability	pH	Opt.	Stability	pH	Opt.	Stability	pH	Opt.	Stability
3	0	9	6	43.75	76.14	8	42.5	45.54	9	49.99	53.7
4	0	12	7	100	100	9	32.4	34.73	10	0	4
5	0	12	8	30.46	84.37
6	19.5	28.95

## Sheet: Fig.5
NaCl	Activity
0	100
0.25	113
0.5	116
0.75	116
1	105
1.25	95
1.5	71
2	51
2.5	33

## Sheet: Fig.6
Glucose	Activity
0	100
5	77
10	59
25	32
50	15
100	7
200	2
250	0
500	0
1000	0
