# Supplementary material for: Cloning, purification, and characterization of GH3 β-glucosidase, MtBgl85, from Microbulbifer thermotolerans DAU221
Source: PubMed Central journal article supplement (PMC6657685; doi:10.7717/peerj.7106), 2019-07-22
Supplement: peerj-07-7106-s002.pdf [file peerj-07-7106-s002.pdf]

ATGAAAAAGTATCCCATTTATATTGCCGCTATGGCCGGGCTTCTCTCGCTCGCCGCCACT 60  
M K K Y P I Y I A A M A G L L S L A A T  
CTGCCACTTCAGGCCGCCAACGAATCTGTGGCTACCACCCAATCCCACAGCCAACAAAAT 120  
L P L Q A A N E S V A T T Q S H S Q Q N  
GCCATCGAGTCCCGTATCCAGAGCCTACTCGCACAAATGTCCGTGCAGGAAAAAATCGGT 180  
A I E S R I Q S L L A Q M S V Q E K I G  
CAGCTGGCACTGCGCGACTGGGGAACCTTCAAGGCCGAGGATATGAAAGATATCAAGCAG 240  
Q L A L R D W G T F K A E D M K D I K Q  
GCAATACGCGAAGGACGCGTCGGAGGGTTCCTGAATGTCAACTTCAGTTCCGTGGATAAC 300  
A I R E G R V G G F L N V N F S S V D N  
AATGCATTCGAGGAATTGCAACGCCTCGCCGTGGAAGAAAGCCCCGGGGCATTCCGCTT 360  
N A F E E L Q R L A V E E S P R G I P L  
CTGTTTGGGCAGGATGTAATCCACGGCTACGAAACCATTTTCCAATTCCTCTCGGCCAA 420  
L F G Q D V I H G Y E T I F P I P L G Q  
GCCGCCAGCTGGAATCCGGAAGTATTAGAAACGGGGCGCGCATCGCCGCACAAGAGGCC 480  
A A S W N P E L I R N G A R I A A Q E A  
AGCGCCGATGGCATCCGCTGGACCTTTCACCCATGATCGACATCAGCCGCGACCCGCGC 540  
S A D G I R W T F A P M I D I S R D P R  
TGGGGCCGCATCGCCGAAACCCTGGGGGAAGATCCTCTGCTGACCTCGATCCTCGGTGTC 600  
W G R I A E T L G E D P L L T S I L G V  
GCCATGGTGAAGGTTTCCAGACTGACAACCTCTCCGATCCCACCAGCCTCGCTGCCTGT 660  
A M V E G F Q T D N L S D P T S L A A C  
GGCAAACACTTTGCCGGCTACGGTGC CGCAGAAGGCGGCCGCGATTACAACAGTGCTTAT 720  
G K H F A G Y G A A E G G R D Y N S A Y  
ATTCCCGAGCGCCTGCTACGCGATATCTACCTGCCGCCGTTCAAGGCCGGTATAGACGCA 780  
I P E R L L R D I Y L P P F K A G I D A  
GGTATGCAGAGCATCATGAGTACCTACAGCTCCCTCAACGATGTCCCCGGCACTGGTAGC 840  
G M Q S I M S T Y S S L N D V P G T G S  
CCCTTCCTGTTCAAACAGATTCTGCGAGACGAATGGGGGTTTGACGGCTTTGTAGTAAGT 900  
P F L F K Q I L R D E W G F D G F V V S  
GACTGGAACGCGGTGATGGAAATGATTCCCTCACGGCTATGCTCGCGACGCCAAGCACGCC 960  
D W N A V M E M I P H G Y A R D A K H A  
GCCGCCCTTGCCGCCAATGCGGGCATCGATATGGAGATGCACACGGACACCTACGAACAA 1020  
A A L A A N A G I D M E M H T D T Y E Q  
TTCCTGGCAAGATTAATGGACGAAGGGGAATTTACCGAAGCACAGTTAGATACAGCGGTG 1080  
F L A R L M D E G E F T E A Q L D T A V  
GCCAATATCCTGCGGGTAAAACCTGCGCTTAGGACTGTGGGAAAACCCCTACCCCGAGCA 1140  
A N I L R V K L R L G L W E N P Y P R A  
AAAACGCCAGCCGAGCGTGAGCAGATCATCCGCAACGACCAATTCCTGAATGCCGCCAAA 1200  
K T P A E R E Q I I R N D Q F L N A A K  
GAGGCCGCCAAGGAAACCTTCGTCCTACTCAAAAACGACAAACAGCTGCTGCCGCTGAAG 1260  
E A A K E T F V L L K N D K Q L L P L K  
AAAGGCCAGACGGTGCACCTTATTGGCCCATTGGCGGATGCCCTCACGAGCAGATGGGC 1320  
K G Q T V A L I G P L A D A P H E Q M G  
ACTTGGGTGTACAACGGTAACAAAGAACACTCGCGCACCCCTGCTACCTGCACTGCGCGCG 1380  
T W V Y N G N K E H S R T L L P A L R A

ATGGTGGGTGATAAAGGTAAAATTCTCTACGCCGCCGGCCTCGAATACAGCCGGGACACC 1440  
M V G D K G K I L Y A A G L E Y S R D T  
AGCACGCGCGGTTTTCAAAGCGGCAATCAAAGCGGCCAAAAAAGCCGATGTAGTGCTTTTT 1500  
S T R G F K A A I K A A K K A D V V L F  
GTCGGCGGGCAGGAAGCTATCCTCTCCGGCGAGGGCCACAGCCGCGGCGATATTTCGCCTG 1560  
V G G E E A I L S G E G H S R G D I R L  
CCCGGCGCACAGGCGCAACTGCTGGCAGAGCTGGCCAAGACCGGCAAGCCGCTGGCAATG 1620  
P G A Q A Q L L A E L A K T G K P L A M  
GTATTGATGGCTGGGCGCCCGTTGCAGCTGGATCAAACCCTCGAACAGGCCGACGCAGTG 1680  
V L M A G R P L Q L D Q T L E Q A D A V  
ATGATGGCCTGGCACCCGGGAACCATGGCCGGACCGGCACTGGCGGAGGTGCTCTACGGA 1740  
M M A W H P G T M A G P A L A E V L Y G  
GAAACCTCACCTTCCGGCCGCCTGCCGTTGAGCTGGCCGGTGGGCGCGGGCCAGATCCCT 1800  
E T S P S G R L P L S W P V G A G Q I P  
ATCTATTACAACCACCTACCTACTGGCCGTCCGGCAACCGATGACAATTACACTCGTATC 1860  
I Y Y N H L P T G R P A T D D N Y T R I  
GAAAAAATCGGTTCGCGAGGTGTTTCAGCATCAGCCGGGCAACTCATCCAATCTGCTGGAT 1920  
E K I G R E V F Q H Q P G N S S N L L D  
TACGGGCACAAACCGCTGTTCCCATTCGGTTACGGCCTCACCTACAGCGAATTCCATTAC 1980  
Y G H K P L F P F G Y G L T Y S E F H Y  
AGTGAACCTGGAACCTTCCGACAGCACTCTGGATGCAGATGGACAATTGCATGTTTCCGCC 2040  
S E L E L S D S T L D A D G Q L H V S A  
ACCATCACCAACACCGGCAAGCGCACCCGCCACCGAAACCGTGCAATTGTATGTGCGCGAC 2100  
T I T N T G K R T A T E T V Q L Y V R D  
TTGGTGGGCAGTGTGTTCGCGGCCCGGTACGGGAATTAAGGGTTTCGAGCGTATTACCCTG 2160  
L V G S V S R P V R E L K G F E R I T L  
GCGCCCGGAGAATCCCGTCGCGTGAGTTTTACTTTAAAGCCAACCAGCTGGCCTTCCAC 2220  
A P G E S R R V S F T L K A N Q L A F H  
AACGCGCAGATGCAACAGGTGATCGAGCCCGGTGAATTCCATGTATGGATTGCACCAGAC 2280  
N A Q M Q Q V I E P G E F H V W I A P D  
GCAGAATCGGGCTTGCAGGGCAGCTTTACCCTGCAATAA 2319  
A E S G L Q G S F T L Q \*
